# Supplementary material for: Mobile genomics: tools and techniques for tackling transposons
Source: Philos Trans R Soc Lond B Biol Sci. 2020 Feb 10;375(1795):20190345. doi: 10.1098/rstb.2019.0345 (PMC7061981; doi:10.1098/rstb.2019.0345)
Supplement: Table S1: Software packages discussed in this review [file rstb20190345supp1.xlsx]

## Sheet: Sheet1
Sequencing Data format	Software Package	Includes Multimappers	Includes Iterative Statistics	TE Locus-Specific Calls	TE-centric	Publication
RNA	RSEM	y	y	n	n	Li et al. BMC Bioinformatics 2011
RNA	RepEnrich	y	n	n	y	Criscione et al. BMC Genomics 2014
RNA	TETranscripts	y	y	n	y	Jin et al. Bioinformatics 2015
RNA	TETools	y	n	n	y	Lerat et al. Nucleic Acids Research 2017
RNA	Yanagi	y	n	n	n	Gunady et al. bioRxiv 2018
RNA	SINEsFIND	n	n	y	SINEs	Carnevali et al. DNA Research 2017
RNA	SalmonTE	y	y	n	y	Jeong et al. PacBio Symposium on Biocomputing 2018
RNA	ERVmap	y	n	y	ERVs	Tokuyama et al. PNAS 2018
RNA	SQuIRE	y	y	y	y	Yang et al. Nucleic Acids Research 2019
RNA	LIONS	y	n	y	TE Fusions	Babian et al. Bioinformatics 2019
RNA	TeXP	y	n	n	LINE-1	Navarro et al. PLoS Comp Bio 2019
RNA	Telescope	y	y	y	y	Bendall et al. PLoS Comp Bio 2019
RNA	Scavenger	y	n	n	n	Yang et al. F1000Research 2019
sRNA	miRDeep2	y	n	n	n	Friedlånder et al. Nucleic Acids Research 2012
sRNA	ShortStack	y	n	y	y	Axtell RNA 2013
sRNA	Butter	y	y	y	y	Axtell bioRxiv 2014
sRNA	PiPipes	y	n	n	y	Han et al. Bioinformatics 2015
sRNA	Chimira	y	n	n	n	Vitisos and Enright Bioinformatics 2015
sRNA	unitas	y	n	n	y	Gebert et al. BMC Genomics 2017
sRNA	Oasis 2	y	n	n	n	Rahman et al. BMC Bioinformatics 2018
sRNA	TEsmall	y	n	n	y	O'Neill et al. Frontiers in Genetics 2018
sRNA	Manatee	y	n	n	n	Handzlik et al. bioRxiv 2019
ChIP	CSEM	y	y	y	n	Chung et al. PLoS Comp Bio 2011
ChIP	MOSAiCS	y	y	y	n	Kuan et al. J Am Stat Assoc 2011
ChIP	LONUT	y	n	y	n	Wang et al. PLoS One 2013
ChIP	DROMPA	y	n	y	n	Nakato et al. Genes to Cells 2013
ChIP	Perm-seq	y	y	y	n	Zeng et al. PLoS Comp Bio 2015
ChIP	MapRRCon	y	n	n	LINE1	Sun et al. PNAS 2018
ChIP	Crunch	y	n	y	n	Berger et al. Genome Research 2019
CLIP	CLIPSeqTools	y	n	n	n	Maragkakis et al. RNA 2016
CLIP	CLAM	y	y	n	n	Zhang and Xing Nucleic Acids Research 2017
CLIP	PROBer	y	y	y	n	Li et al. Cell Systems 2017
General Purpose Re-aligner	Gibbs Sampler	y	y	n	n	Wang et al. Bioinformatics 2010
General Purpose Re-aligner	MMR	y	y	n	n	Kahles et al. Bioinformatics 2016
General Purpose Re-aligner	CoCo	y	n	n	n	Deschamps-Francoeur et al. Bioinformatics 2019
Bisulfite	BSMAP	y	n	y	n	Xi et al. BMC Bioinformatics 2009
Bisulfite	Bismark	y	n	y	n	Krueger et al. Bioinformatics 2011
Bisulfite	MOABS	n	n	y	n	Sun et al. Genome Biology 2014
Bisulfite	BS-Seeker3	n	n	y	n	Huang et al. BMC Bioinformatics 2018
Bisulfite	bicycle	n	n	y	n	Graña et al. Bioinformatics 2018
Bisulfite	TEPID	n	n	y	y	Stuart et al. eLife 2016
Bisulfite	epiTEome	n	n	y	y	Daron et al. Genome Biology 2017
HiC	mHiC	y	n	y	y	Zheng et al. 2019 eLife
